# Supplementary material for: Activation of SF5CF3 by the N-Heterocyclic Carbene SIMes
Source: MDPI journal article supplement (doi:10.3390/molecules28186693), 2023-09-19
Supplement: s1 [file s1]

## Supporting Information

### Activation of SF<sub>5</sub>CF<sub>3</sub> by the *N*-heterocyclic Carbene SIMes

Domenique Herbstritt<sup>1</sup>, Pooja Tomar<sup>1</sup>, and Thomas Braun<sup>1\*</sup>

*Humboldt-Universität zu Berlin, Department of Chemistry, Brook-Taylor-Straße 2, D-12489 Berlin, Germany. E-mail: thomas.braun@chemie.hu-berlin.de*

## NMR Spectra

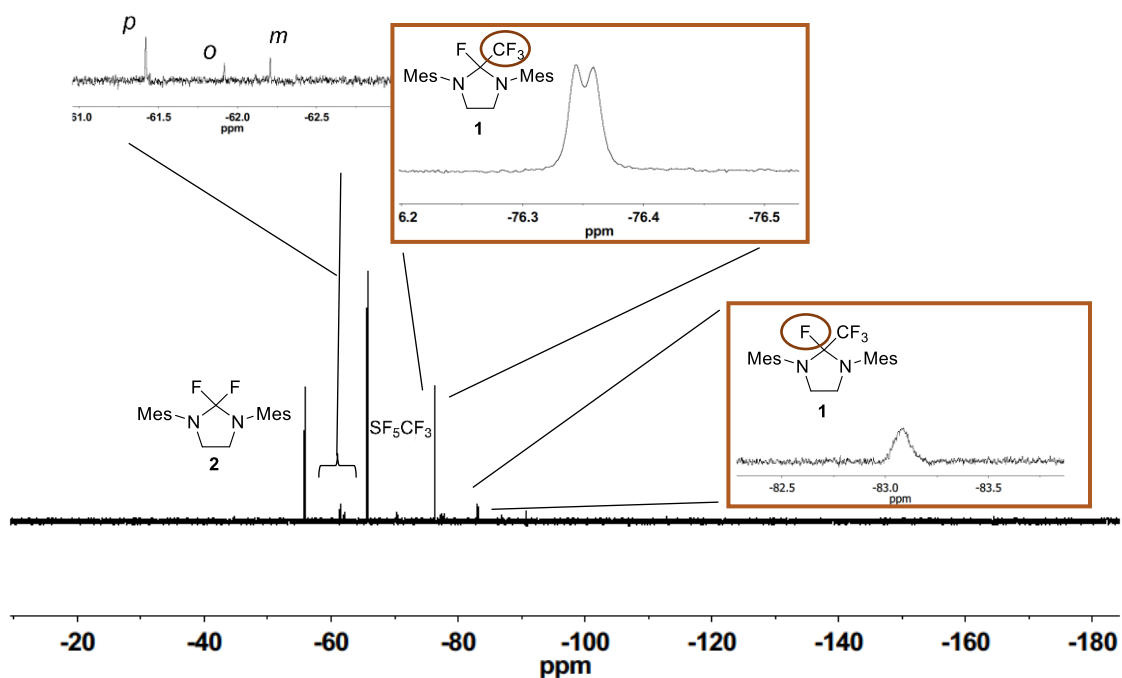

**Figure S1:**  $^{19}\text{F}$  NMR spectra for 1,3-dimesityl-2-fluoro-2-trifluoromethylimidazolidine (**1**) and 1,3-dimesityl-2,2-difluoroimidazolidine (**2**) in  $\text{toluene-d}_8$  after heating of SIMes and  $\text{SF}_5\text{CF}_3$  at  $90^\circ\text{C}$ .

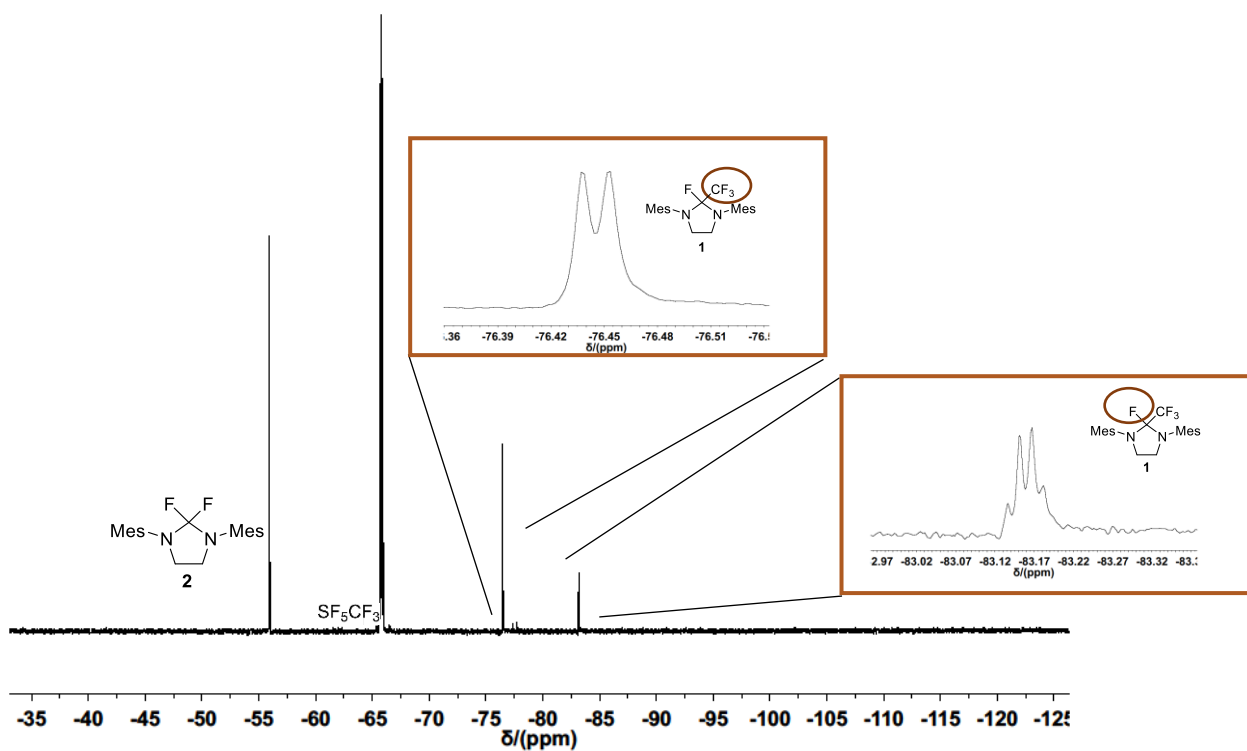

**Figure S2:**  $^{19}\text{F}\{^1\text{H}\}$  NMR spectra for 1,3-dimesityl-2-fluoro-2-trifluoromethylimidazolidine (**1**) and 1,3-dimesityl-2,2-difluoroimidazolidine (**2**) in toluene- $d_8$  after heating of SIMes and  $\text{SF}_5\text{CF}_3$  at 90 °C.

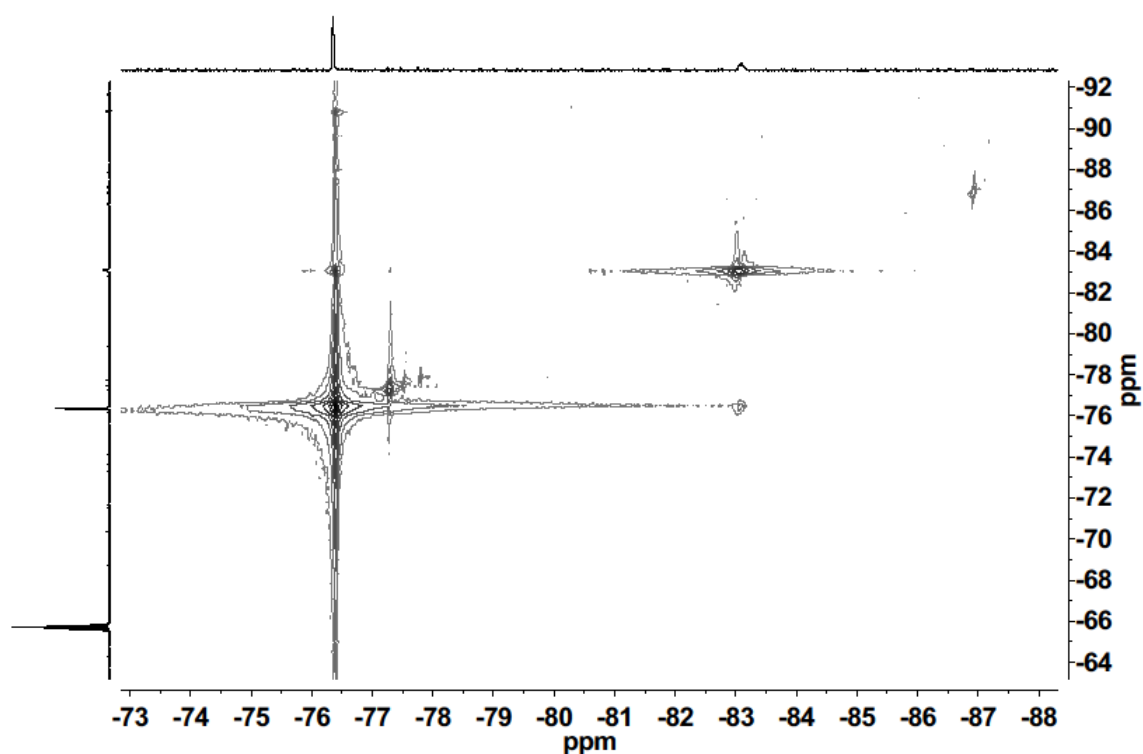

**Figure S3:**  $^{19}\text{F}^{19}\text{F}$  COSY NMR spectrum for 1,3-dimesityl-2-fluoro-2-trifluoromethylimidazolidine (**1**) in toluene- $d_8$  after heating of SIMes and  $\text{SF}_5\text{CF}_3$  at 90 °C.

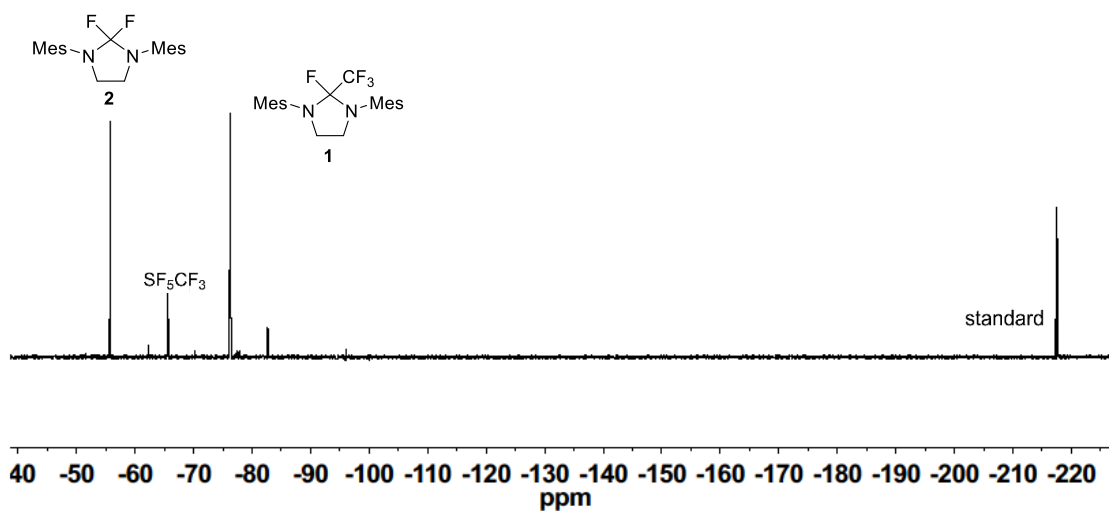

**Figure S4:**  $^{19}\text{F}$  NMR spectrum for 1,3-dimesityl-2-fluoro-2-trifluoromethylimidazolidine (**1**) and  $\text{SiMesF}_2$  (**2**) in  $\text{C}_6\text{D}_6$  after irradiation of  $\text{SiMes}$  and  $\text{SF}_5\text{CF}_3$  at 311 nm after 3 h.

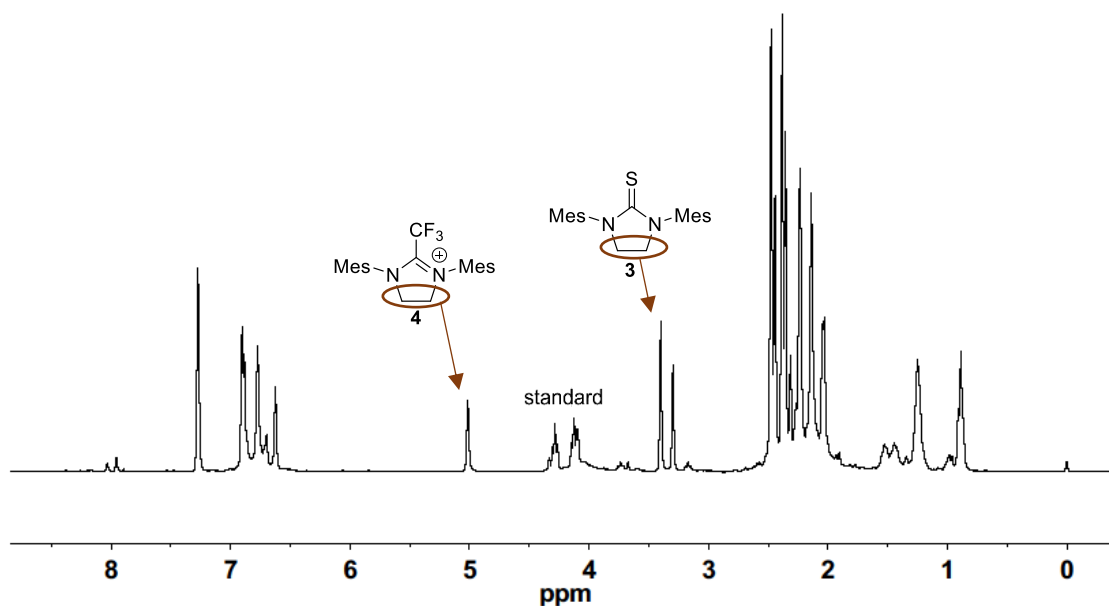

**Figure S5:**  $^1\text{H}$  NMR spectrum for compounds **3** and **4** in  $\text{C}_6\text{D}_6$  after irradiation of  $\text{SiMes}$  and  $\text{SF}_5\text{CF}_3$  at 311 nm after 16 h.

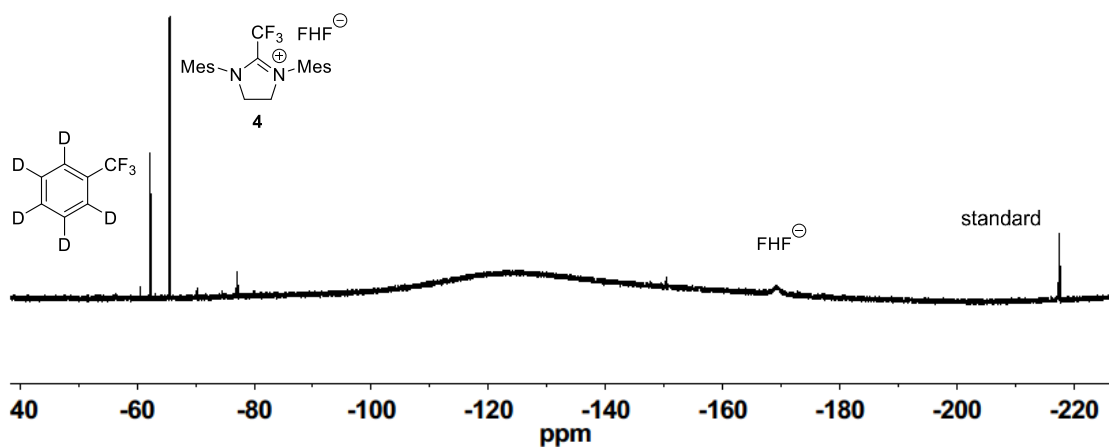

**Figure S6:**  $^{19}\text{F}$  NMR spectrum for compound **4** in  $\text{C}_6\text{D}_6$  after irradiation of SIMes and  $\text{SF}_5\text{CF}_3$  at 311 nm after 16 h.

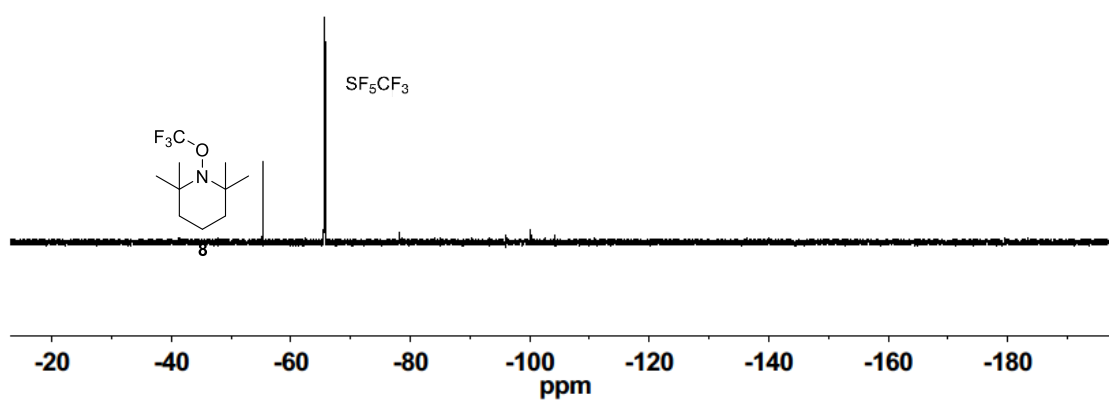

**Figure S7:**  $^{19}\text{F}$  NMR spectrum for compound **8** in  $\text{C}_6\text{D}_6$ .

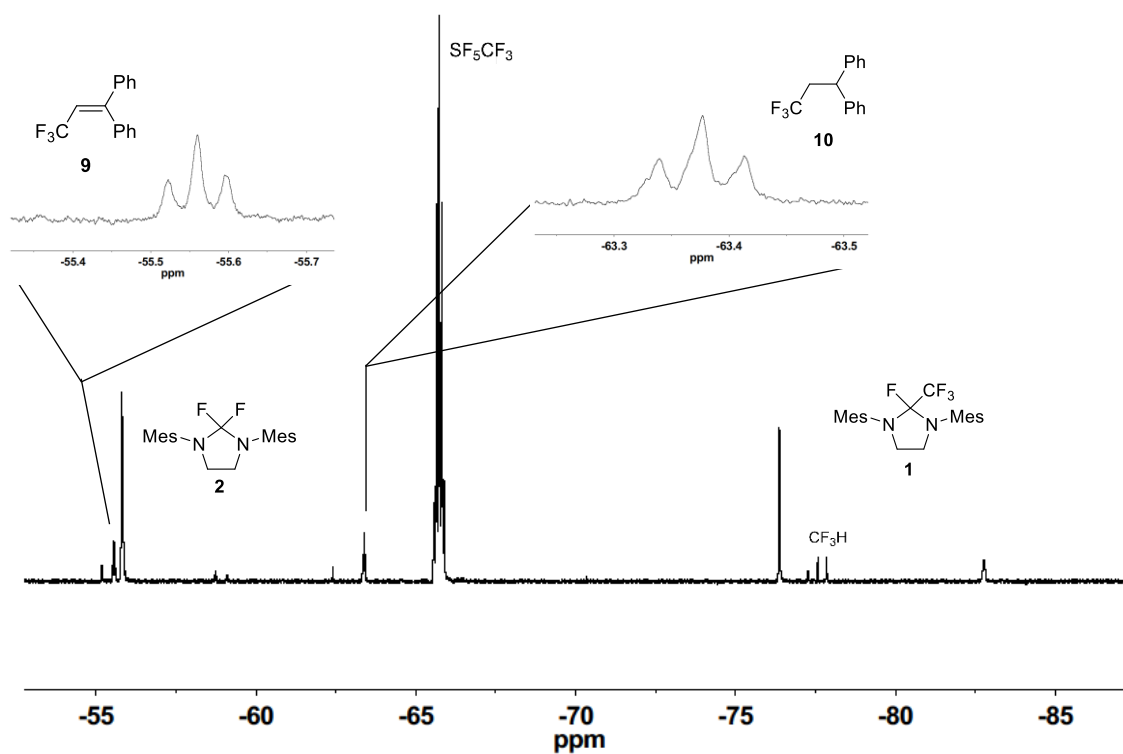

**Figure S8:**  $^{19}\text{F}$  NMR spectrum for compounds **1**, **2**, **9** and **10** in  $\text{C}_6\text{D}_6$  after irradiation of SIMes,  $\text{SF}_5\text{CF}_3$  and 1,1-diphenylethylene at 311 nm for 3 h.

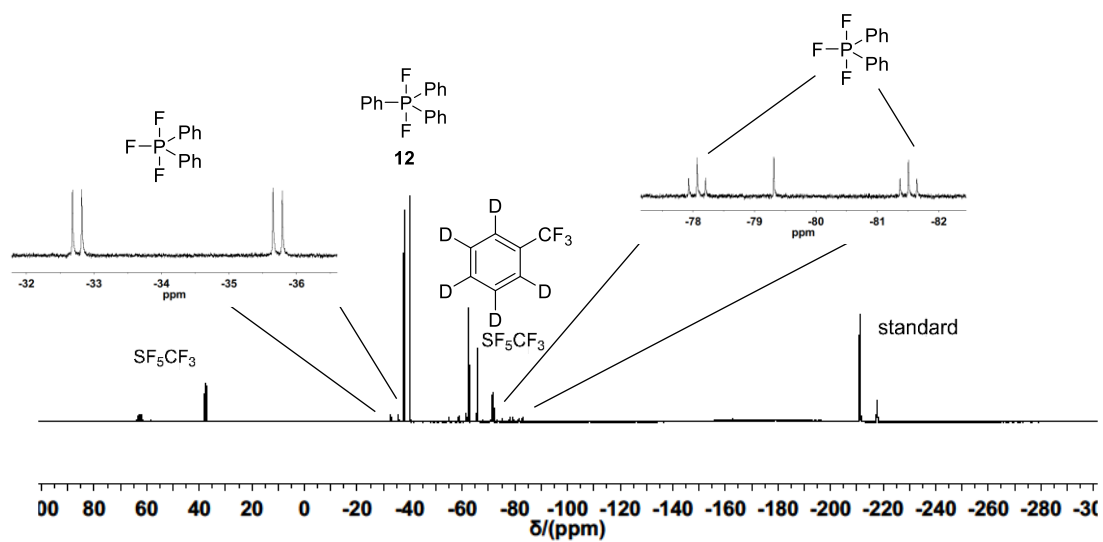

**Figure S9:**  $^{19}\text{F}$  NMR spectrum for compound **12** and  $\alpha,\alpha,\alpha$ -trifluorotoluene- $\text{d}_5$  in  $\text{C}_6\text{D}_6$ .

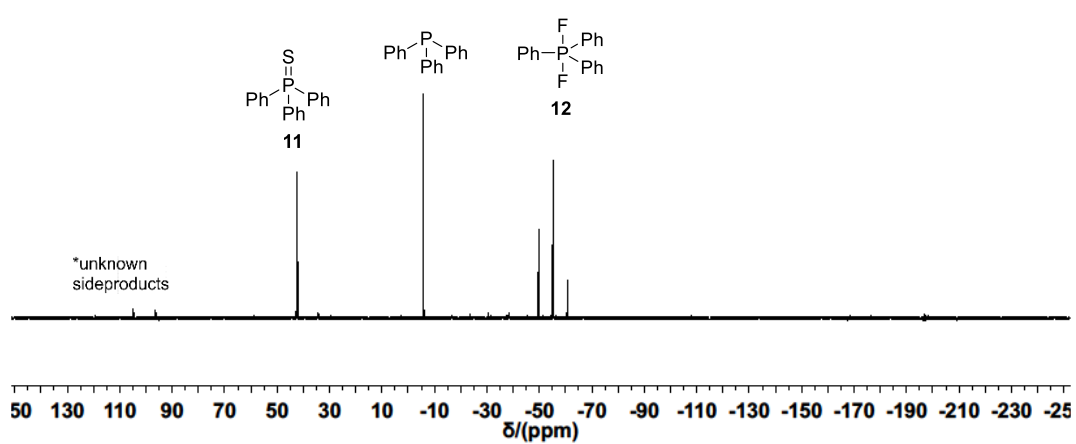

**Figure S10:**  $^{31}\text{P}$  NMR spectrum for compounds **11** and **12** in  $\text{C}_6\text{D}_6$ .
